# Supplementary material for: The Transcription Factor NRF2 Has Epigenetic Regulatory Functions Modulating HDACs, DNMTs, and miRNA Biogenesis
Source: MDPI journal article supplement (doi:10.3390/antiox12030641), 2023-03-04
Supplement: s1 [file s1]

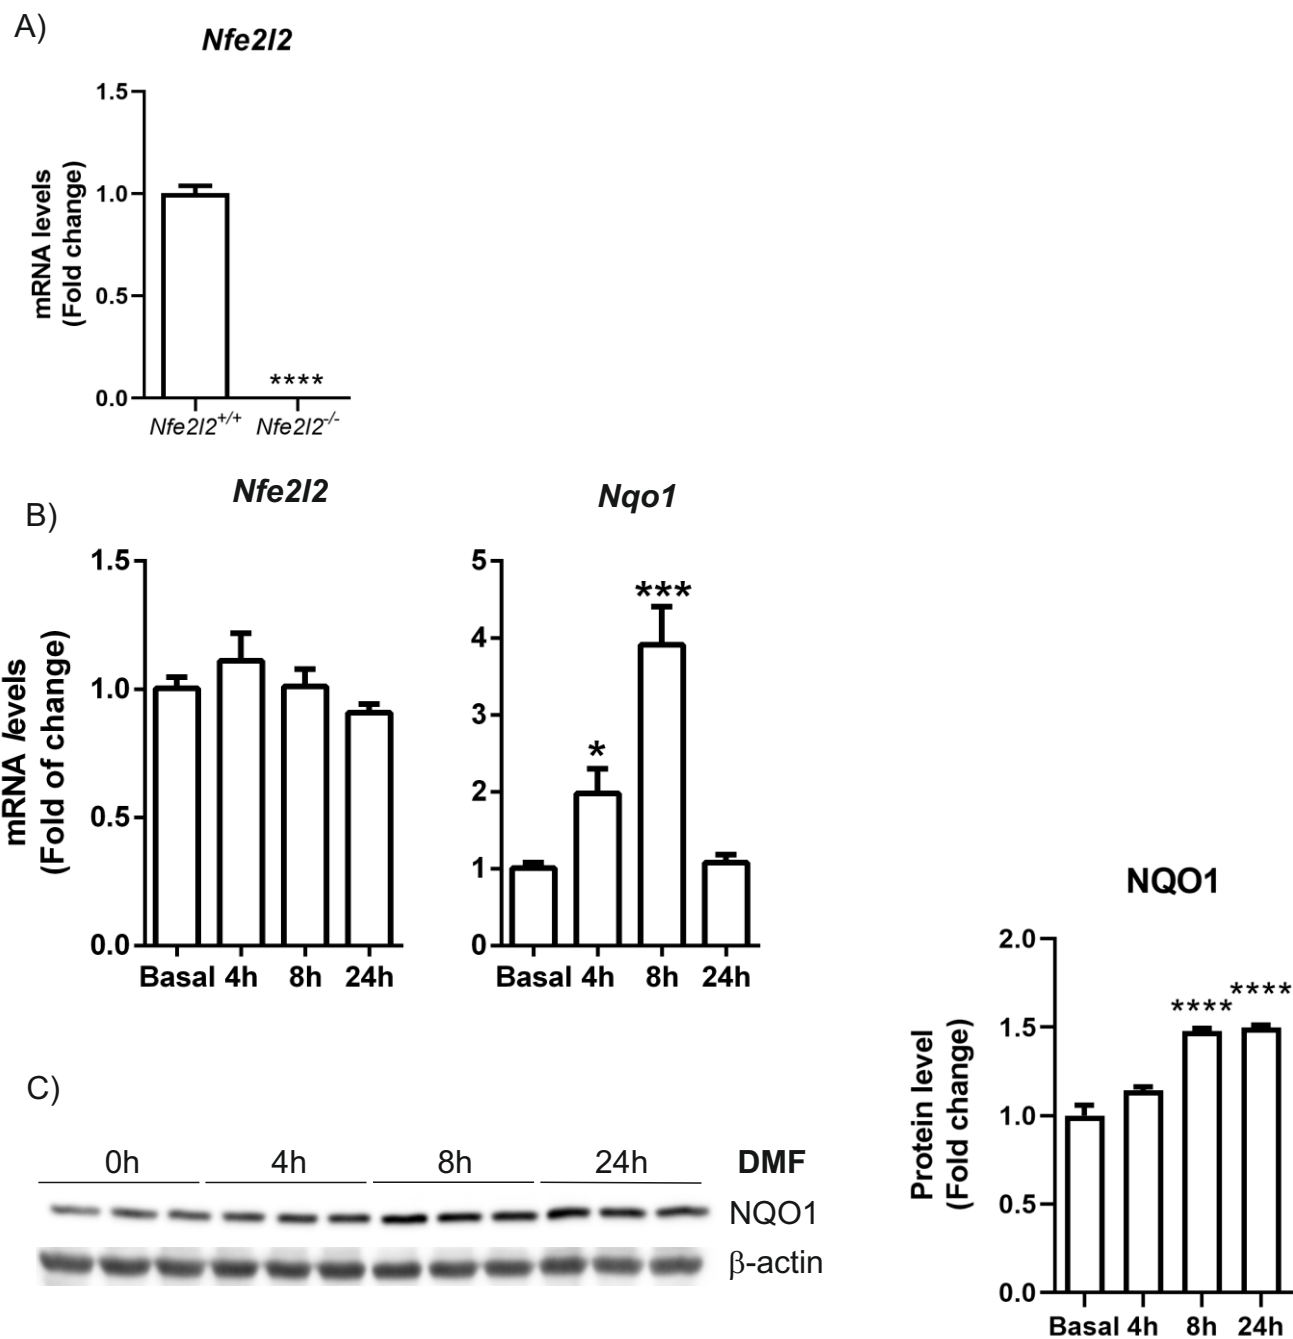

**Suppl. Table 1 – List of transcripts scanned for putative ARE sequences in the human genome (hg19).** HUGO Gene Nomenclature Committee symbols and NCBI Refseq mRNA ID accession numbers are indicated for each gene and transcript.

| Human genome (hg19) |                                                                                                                                                                                                                                                                                                                                                                                    |
|---------------------|------------------------------------------------------------------------------------------------------------------------------------------------------------------------------------------------------------------------------------------------------------------------------------------------------------------------------------------------------------------------------------|
| HGNC<br>Symbol      | Refseq mRNA ID accession number                                                                                                                                                                                                                                                                                                                                                    |
| <i>DGCR8</i>        | NM_001190326, NM_022720                                                                                                                                                                                                                                                                                                                                                            |
| <i>DICER 1</i>      | NM_001195573, NM_001271282, NM_001291628, NM_001395677, NM_001395678, NM_001395679, NM_001395680, NM_001395682, NM_001395683, NM_001395684, NM_001395685, NM_001395686, NM_001395687, NM_001395688, NM_001395689, NM_001395690, NM_001395691, NM_001395692, NM_001395693, NM_001395694, NM_001395695, NM_001395696, NM_001395697, NM_001395698, NM_001395700, NM_030621, NM_177438 |
| <i>DNMT1</i>        | NM_001130823, NM_001318730, NM_001318731, NM_001379                                                                                                                                                                                                                                                                                                                                |
| <i>DNMT3A</i>       | NM_001320892, NM_001320893, NM_001375819, NM_022552, NM_153759, NM_175629, NM_175630                                                                                                                                                                                                                                                                                               |
| <i>DNMT3B</i>       | NM_001207055, NM_001207056, NM_006892, NM_175848, NM_175849, NM_175850                                                                                                                                                                                                                                                                                                             |
| <i>DROSHA</i>       | NM_001100412, NM_001382508, NM_013235                                                                                                                                                                                                                                                                                                                                              |
| <i>HDAC1</i>        | NM_004964                                                                                                                                                                                                                                                                                                                                                                          |
| <i>HDAC2</i>        | NM_001527                                                                                                                                                                                                                                                                                                                                                                          |
| <i>HDAC3</i>        | NM_001355039, NM_001355040, NM_001355041, NM_003883                                                                                                                                                                                                                                                                                                                                |
| <i>SIRT1</i>        | NM_001142498, NM_001314049, NM_012238                                                                                                                                                                                                                                                                                                                                              |
| <i>TARBP2</i>       | NM_004178, NM_134323, NM_134324                                                                                                                                                                                                                                                                                                                                                    |

**Suppl. Table 2 – List of transcripts scanned for putative ARE sequences in the mouse genome (mm10).** Mouse Genome Informatics symbols and NCBI Refseq mRNA ID accession numbers are indicated for each gene and transcript.

| Mouse genome (mm10) |                                                                                                                           |
|---------------------|---------------------------------------------------------------------------------------------------------------------------|
| MGI Symbol          | Refseq mRNA ID accession number                                                                                           |
| <i>Dgcr8</i>        | NM_033324                                                                                                                 |
| <i>Dicer1</i>       | NM_148948                                                                                                                 |
| <i>Dnmt1</i>        | NM_001404685, NM_010066, NM_001199431, NM_001314011, NM_001199432, NM_001199433                                           |
| <i>Dnmt3a</i>       | NM_007872, NM_001271753, NM_153743                                                                                        |
| <i>Dnmt3b</i>       | NM_001271744, NM_001271745, NM_001003961, NM_001003960, NM_001271747, NM_001003963, NM_001271746, NM_010068, NM_001122997 |
| <i>Drosha</i>       | NM_001130149, NM_026799                                                                                                   |
| <i>Hdac1</i>        | NM_008228                                                                                                                 |
| <i>Hdac2</i>        | NM_008229                                                                                                                 |
| <i>Hdac3</i>        | NM_010411                                                                                                                 |
| <i>Sirt1</i>        | NM_001159589, NM_019812                                                                                                   |
| <i>Tarbp2</i>       | NM_001253795, NM_009319                                                                                                   |

**Suppl. Table 3. List of primers used in this study.**

| Gene Product  | Forward Primer                   | Reverse Primer                    |
|---------------|----------------------------------|-----------------------------------|
| <i>Actb</i>   | 5' TCCTTCCTGGGCATGGAG 3'         | 5' AGGAGGAGCAATGATCTTGATCTT 3'    |
| <i>Dicer1</i> | 5' TGAGAAGCAAAAAGGTCAGCA 3'      | 5' GCCAGCAAGCAGTCTTTTGT 3'        |
| <i>Dgcr8</i>  | 5' CAAGTGAGCCTTTTGGTGCC 3'       | 5' GATGTGGTTAAAATACTCCAGTTCT 3'   |
| <i>Dnmt1</i>  | 5' AAGGACACGAGACATACTGC 3'       | 5' TGGGTTTCCGTTTAGTGGGG 3'        |
| <i>Dnmt3a</i> | 5' GACGCCAAAGAAGTGTCTGC 3'       | 5' CTTGGCTATTCTGCCGTGCT 3'        |
| <i>Dnmt3b</i> | 5' TCCCCATCCATAGTGCCTT 3'        | 5' TAATGCACTCCTCATACCCGC 3'       |
| <i>Drosha</i> | 5' CTCTGTAGAGACTGTGAATCCTGC 3'   | 5' GCTACATCTTCCGCTCACGA 3'        |
| <i>Gapdh</i>  | 5' CGACTTCAACAGCAACTCCCACTTCC 3' | 5' TGGGTGGTCCAGGGTTTCTTACTCCTT 3' |
| <i>Hdac1</i>  | 5' TTCCTGCGTTCTATTGCCCC 3'       | 5' AAGCCATCAAACACCGGACA 3'        |
| <i>Hdac2</i>  | 5' TACAGTCAAGGAGGCGGCAA 3'       | 5' GGGATGACCCTGGCCATAATAA 3'      |
| <i>Hdac3</i>  | 5' TCAGCCCCACCAATATGCAG 3'       | 5' TGTAACGGGAGCAGAACTCG 3'        |
| <i>Nqo1</i>   | 5' GGTAGCGGCTCCATGTACTC 3'       | 5' CATCCTTCCAGGATCTGCAT 3'        |
| <i>Nfe2l2</i> | 5' CCCGAAGCACCTGAAGGCA 3'        | 5' CCAGGCGGTGGGTCTCCGTA 3'        |
| <i>Sirt1</i>  | 5' GACAGAACGTCACACGCCAG 3'       | 5' AGCTCAGGTGGAGGAATTGT 3'        |
| <i>Tarbp2</i> | 5' GACCTTCTCAAAGCCGAGGG 3'       | 5' GAAAAAGAACTGCTGTCTCTCA 3'      |

**Suppl. Table 4. List of antibodies used in this study.**

| Antibody           | Source                     | Catalog Number | Dilution |
|--------------------|----------------------------|----------------|----------|
| β-ACTIN (C4)       | Santa Cruz Biotechnologies | sc-47778       | 1:1000   |
| β-TUBULIN (TUB2.1) | SIGMA                      | T4026          | 1:3000   |
| DGCR8              | proteintech                | 60084-1-Ig     | 1:1000   |
| DICER1 (F-10)      | Santa Cruz Biotechnologies | sc-136979      | 1:1000   |
| DNMT1              | EPIGENTEK                  | 60B122.1       | 1:1000   |
| DNMT3a (H-295)     | Santa Cruz Biotechnologies | sc-20703       | 1:500    |
| DNMT3b (G-9)       | Santa Cruz Biotechnologies | sc-376043      | 1:500    |
| GAPDH (6C5)        | Santa Cruz Biotechnologies | sc-32233       | 1:1000   |
| HDAC1 (H-51)       | Santa Cruz Biotechnologies | sc-7872        | 1:500    |
| HDAC2 (C-8)        | Santa Cruz Biotechnologies | sc-9959        | 1:500    |
| NQO1               | Abcam                      | ab2346         | 1:1000   |
| DROSHA (C-7)       | Santa Cruz Biotechnologies | sc-393591      | 1:500    |
| SIRT1              | Abcam                      | ab12193        | 1:2000   |
| TARBP2             | SIGMA                      | SAB1406507     | 1:500    |
| VINCULIN (N3C1)    | Gentex                     | GTX109749      | 1:1000   |
